# Supplementary material for: Structure Elucidation and Anticancer Activity of 7-Oxostaurosporine Derivatives from the Brazilian Endemic Tunicate Eudistoma vannamei
Source: Mar Drugs. 2012 May 21;10(5):1092–102. doi: 10.3390/md10051092 (PMC3397465; doi:10.3390/md10051092)

# Supplementary Information

## INDEX

|           |                                                                                                                                                                                       |    |
|-----------|---------------------------------------------------------------------------------------------------------------------------------------------------------------------------------------|----|
| Figure S1 | Fractionation of the aqueous methanol extract of <i>Eudistoma vannamei</i> . The fractionation was guided by the cytotoxic activity against HL-60 leukemia cells using the MTT assay. | S2 |
| Figure S2 | <sup>1</sup> H NMR spectrum (500 MHz, pyridine- <i>d</i> <sub>5</sub> ) of 2-hydroxy-7-oxostaurosporine ( <b>1</b> ) and 3-hydroxy-7-oxostaurosporine ( <b>2</b> ).                   | S3 |
| Figure S3 | <sup>13</sup> C NMR spectrum (125 MHz, pyridine- <i>d</i> <sub>5</sub> ) of 2-hydroxy-7-oxostaurosporine ( <b>1</b> ) and 3-hydroxy-7-oxostaurosporine ( <b>2</b> ).                  | S4 |
| Figure S4 | 2D HSQC spectrum (500 × 125 MHz, pyridine- <i>d</i> <sub>5</sub> ) of 2-hydroxy-7-oxostaurosporine ( <b>1</b> ) and 3-hydroxy-7-oxostaurosporine ( <b>2</b> ).                        | S5 |
| Figure S5 | 2D HMBC spectrum (500 × 125 MHz, pyridine- <i>d</i> <sub>5</sub> ) of 2-hydroxy-7-oxostaurosporine ( <b>1</b> ) and 3-hydroxy-7-oxostaurosporine ( <b>2</b> ).                        | S6 |
| Figure S6 | 2D COSY spectrum (500 × 500 MHz, pyridine- <i>d</i> <sub>5</sub> ) of 2-hydroxy-7-oxostaurosporine ( <b>1</b> ) and 3-hydroxy-7-oxostaurosporine ( <b>2</b> ).                        | S7 |
| Figure S7 | ESI-HRMS spectrum of 2-hydroxy-7-oxostaurosporine ( <b>1</b> ) and 3-hydroxy-7-oxostaurosporine ( <b>2</b> ).                                                                         | S8 |

**Figure S1:** Fractionation of the aqueous methanol extract of *Eudistoma vannamei*. The fractionation was guided by the cytotoxic activity against HL-60 leukemia cells using the MTT assay.

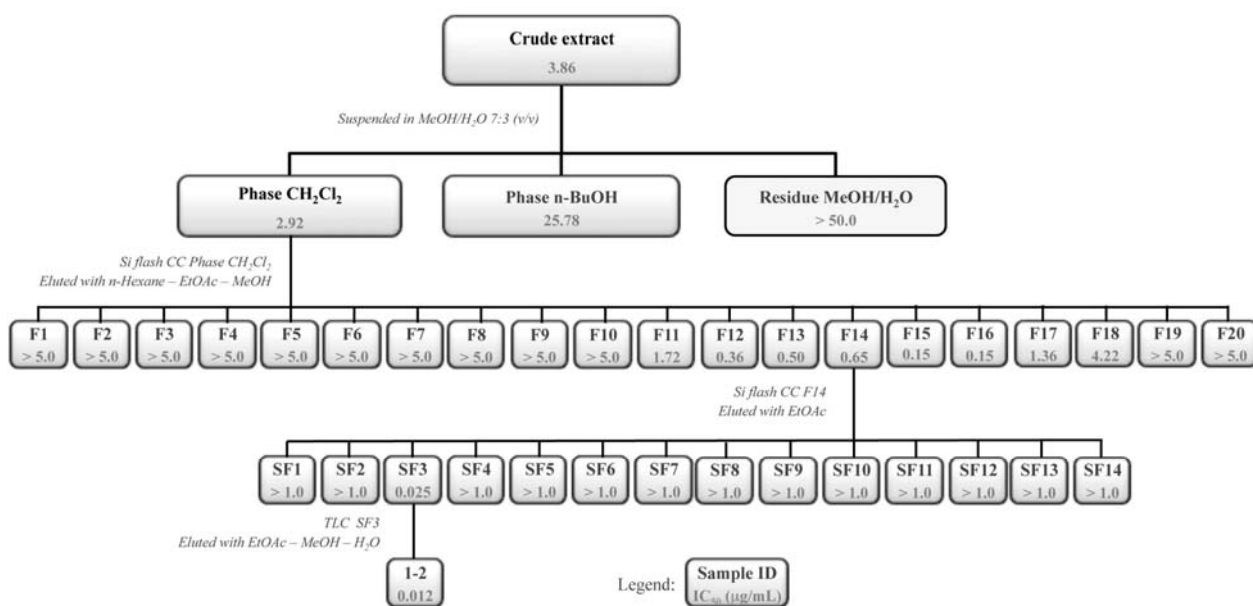

**Figure S2:**  $^1\text{H}$  NMR spectrum (500 MHz, pyridine- $d_5$ ) of 2-hydroxy-7-oxostaurosporine (**1**) and 3-hydroxy-7-oxostaurosporine (**2**).

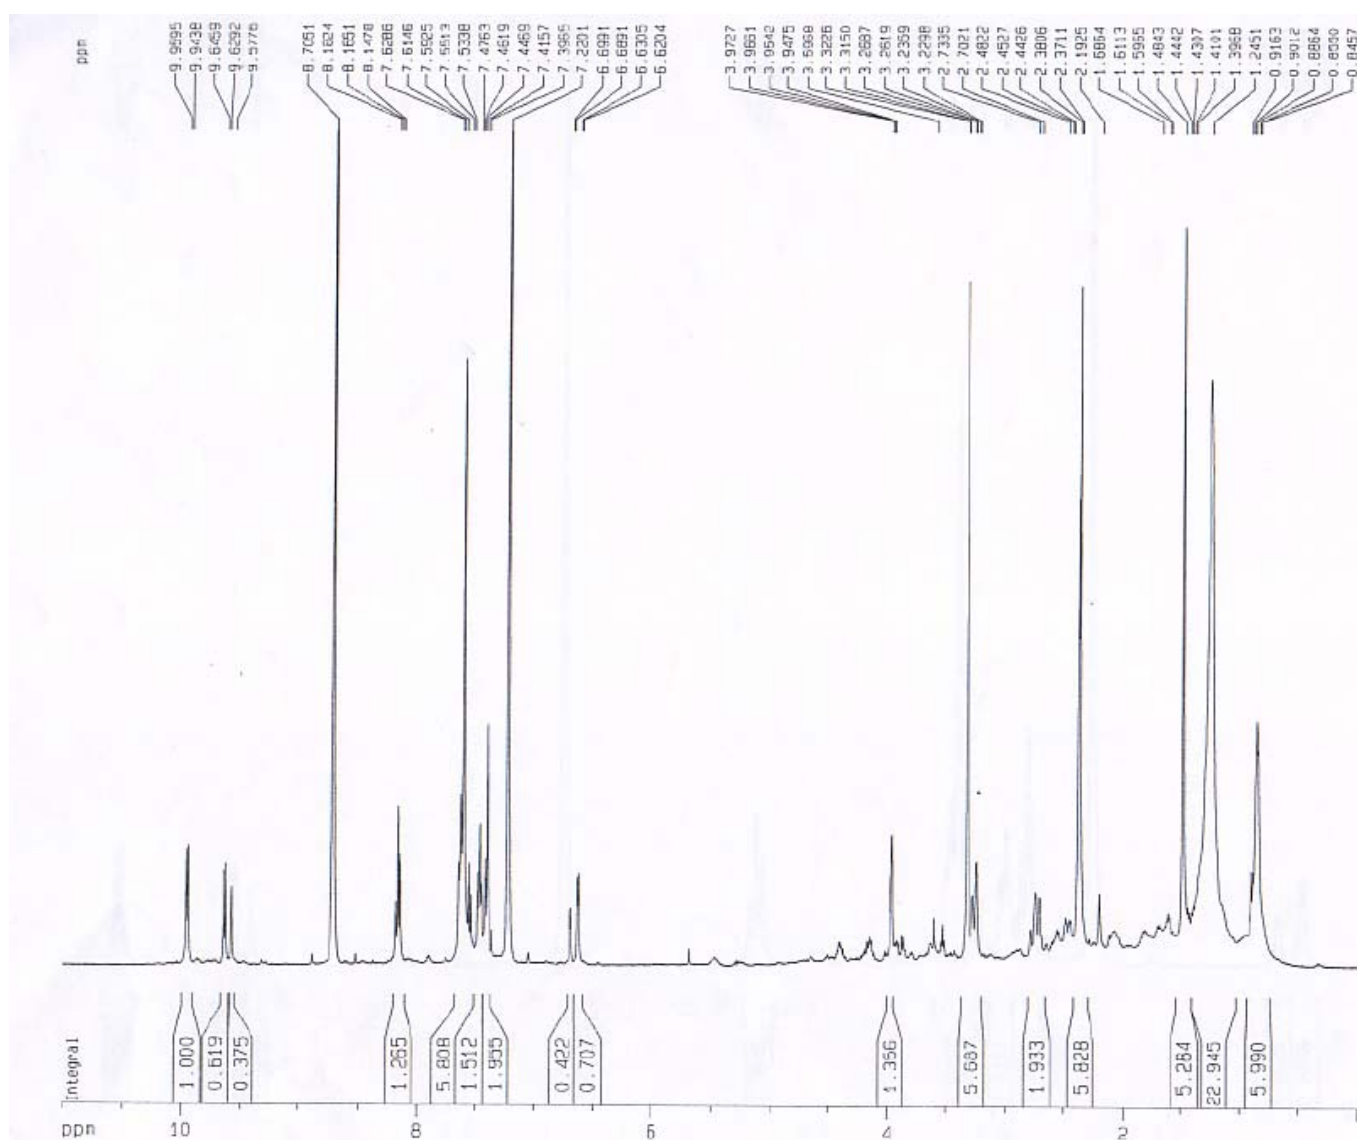

**Figure S3:**  $^{13}\text{C}$  NMR spectrum (125 MHz, pyridine- $d_5$ ) of 2-hydroxy-7-oxostaurosporine (1) and 3-hydroxy-7-oxostaurosporine (2).

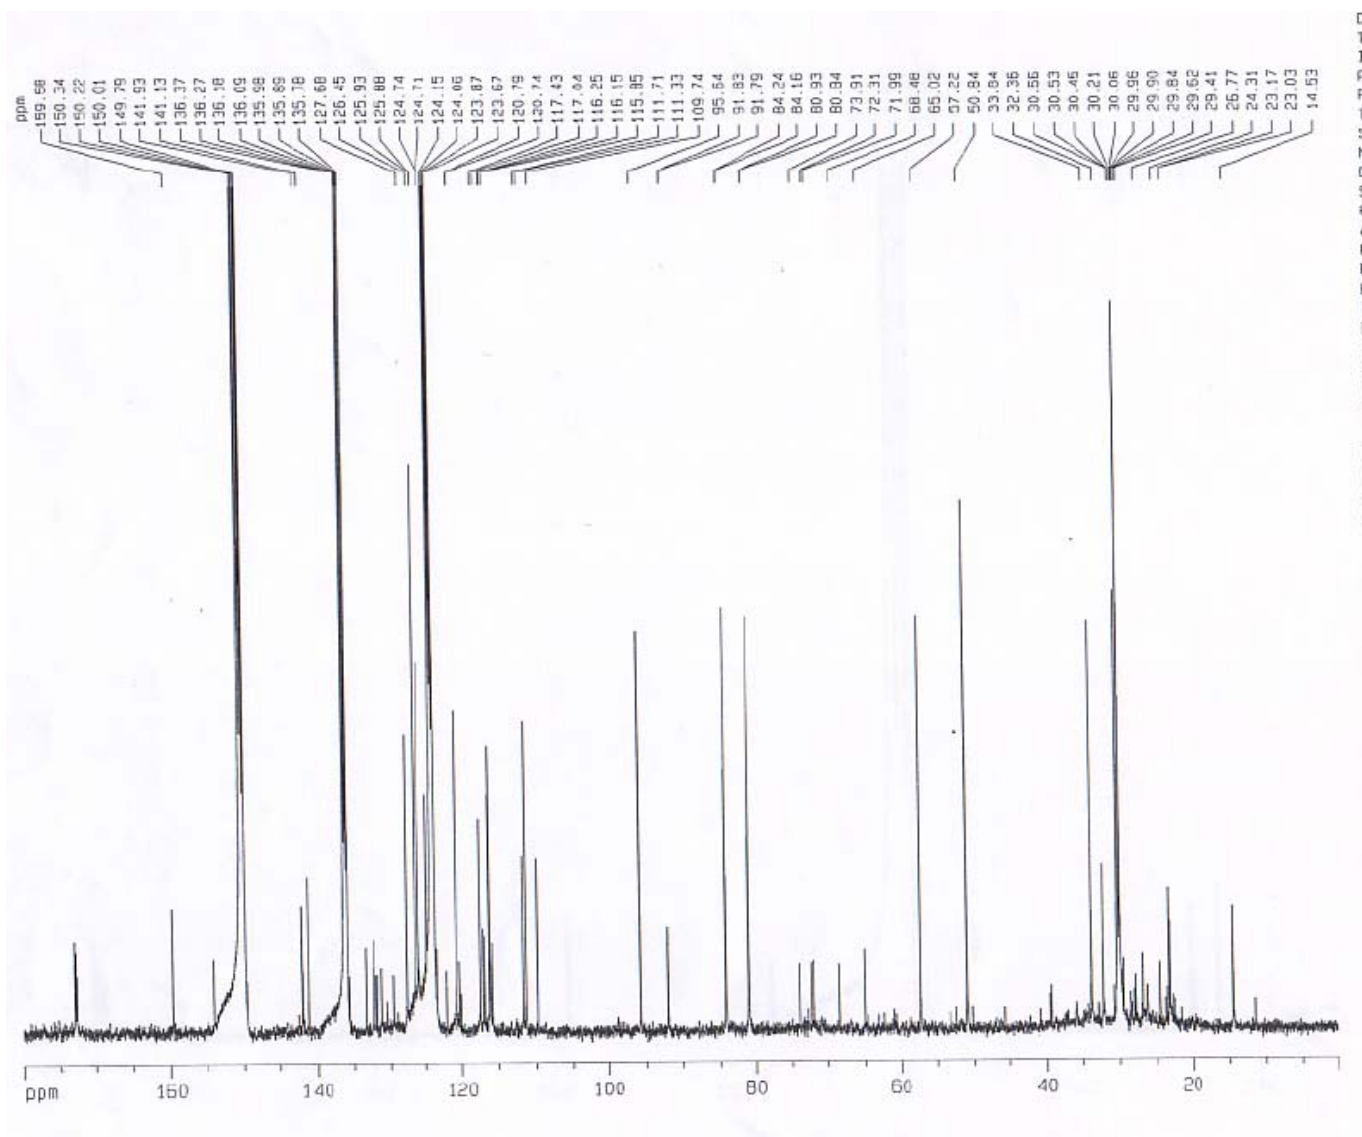

**Figure S4:** 2D HSQC spectrum (500 × 125 MHz, Pyr-d5) of 2-hydroxy-7-oxostaurosporine (**1**) and 3-hydroxy-7-oxostaurosporine (**2**).

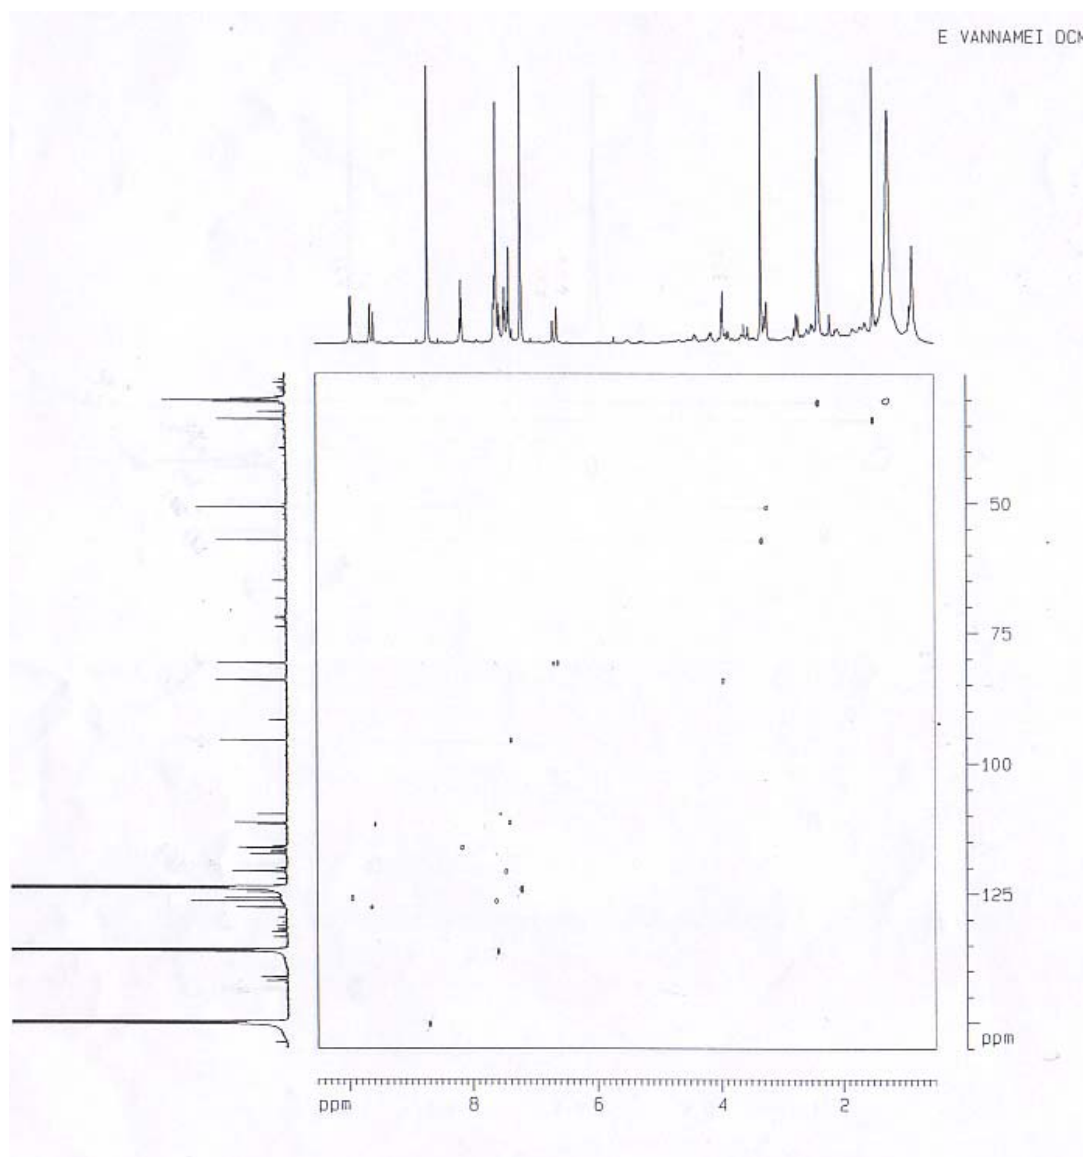

**Figure S5:** 2D HMBC spectrum (500 × 125 MHz, pyridine-*d*5) of 2-hydroxy-7-oxostaurosporine (**1**) and 3-hydroxy-7-oxostaurosporine (**2**).

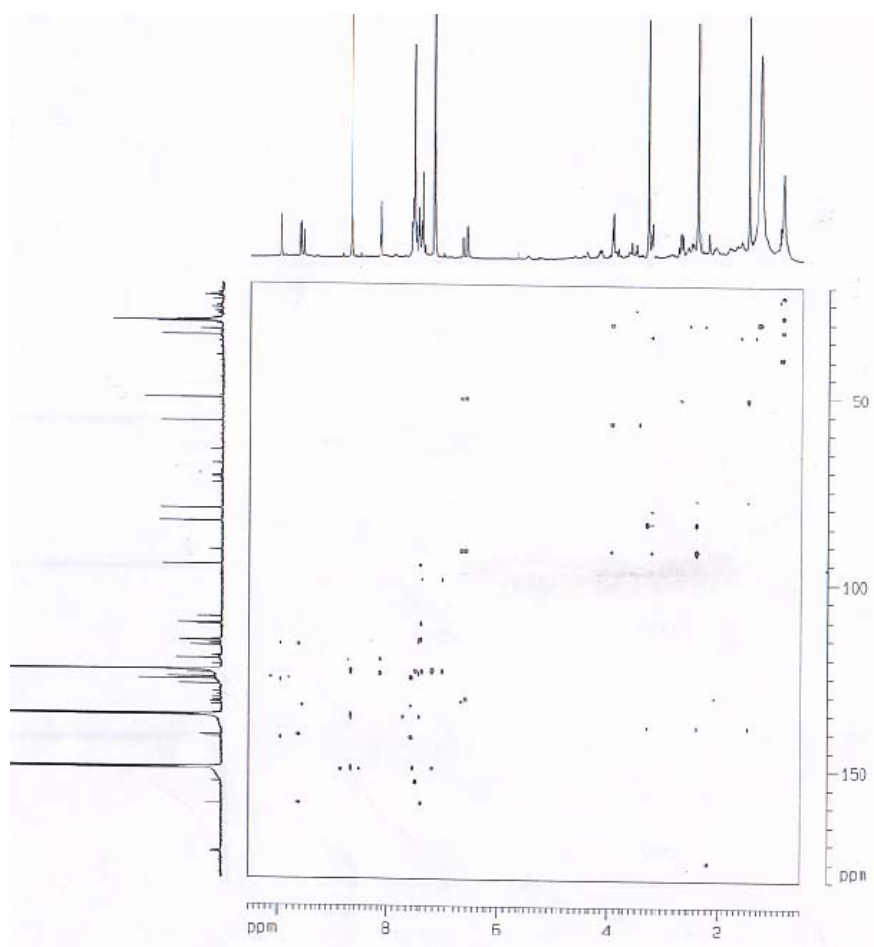

**Figure S6:** 2D COSY spectrum ( $500 \times 500$  MHz, pyridine- $d_5$ ) of 2-hydroxy-7-oxostaurosporine (**1**) and 3-hydroxy-7-oxostaurosporine (**2**).

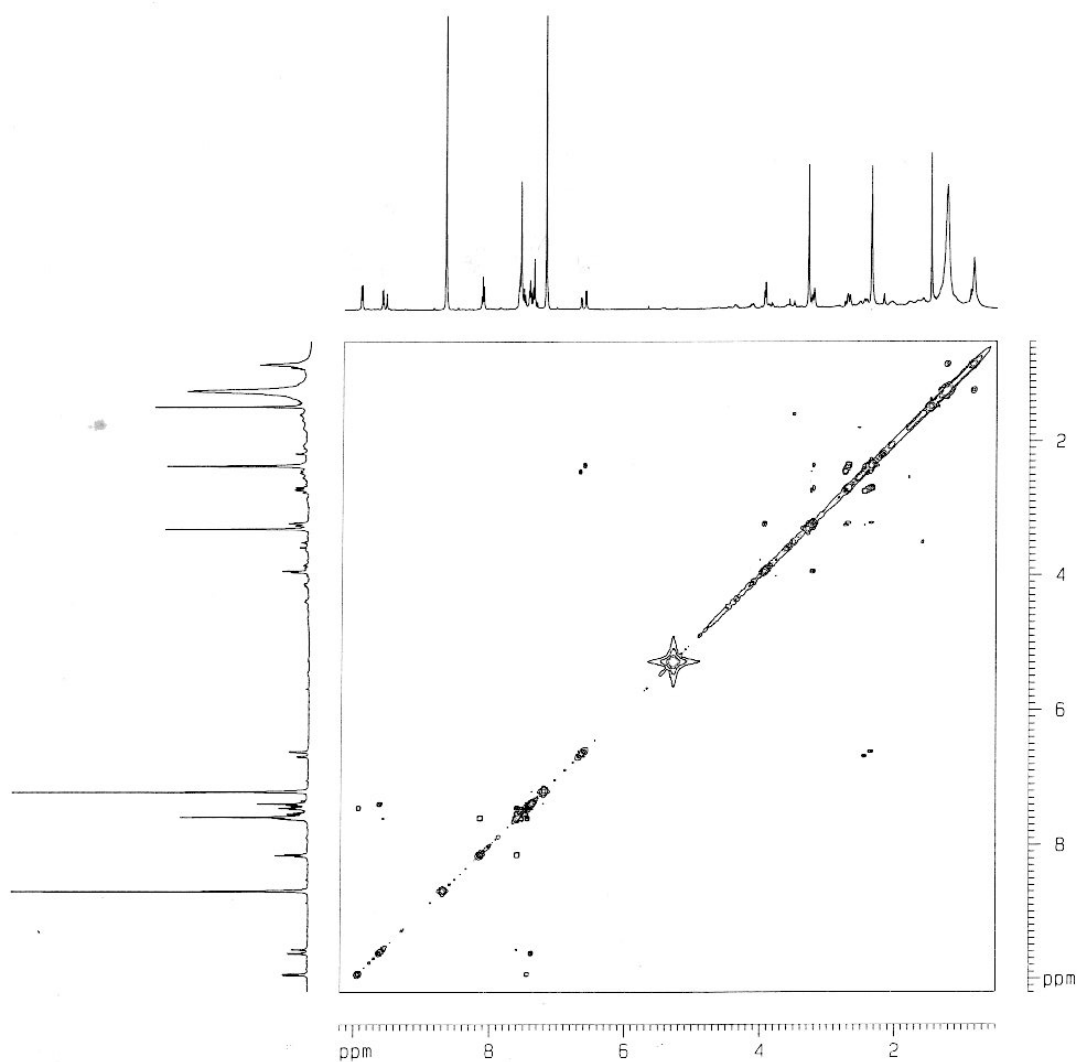

**Figure S7:** ESI-HRMS spectrum of 2-hydroxy-7-oxostaurosporine (**1**) and 3-hydroxy-7-oxostaurosporine (**2**).

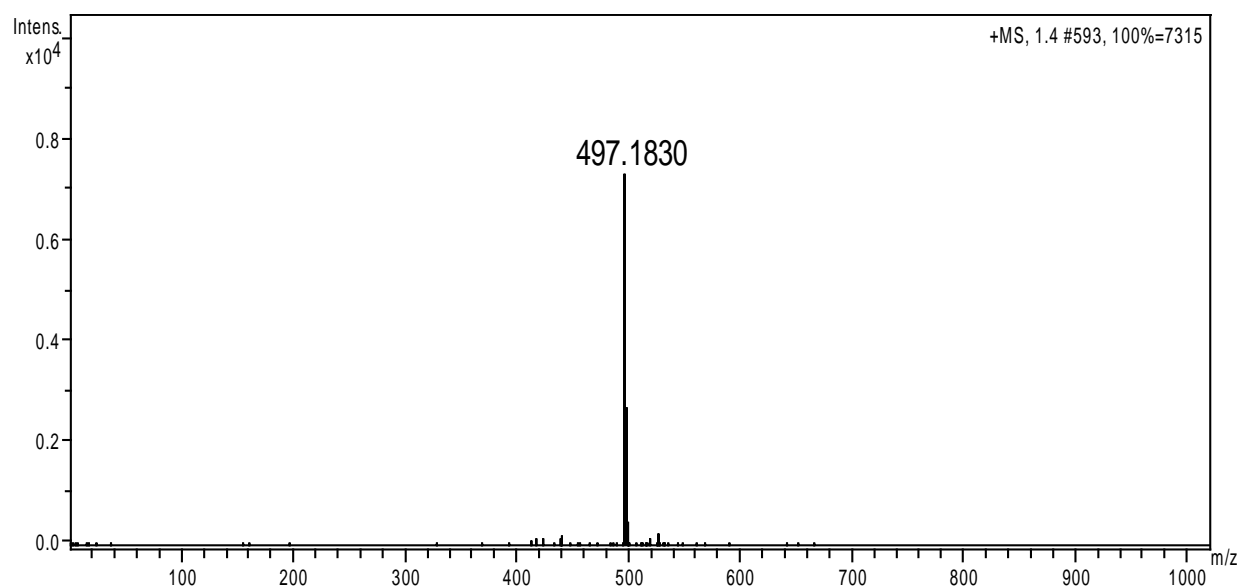

Supplement: Supplementary File 1: — PDF-Document (PDF, 270 KB) [file marinedrugs-10-01092-s001.pdf]
